# Supplementary material
Source: bioRxiv or medRxiv preprint supplement (https://www.medrxiv.org/highwire/filestream/77604/field_highwire_adjunct_files/0/2020.04.19.20065219-1.pdf)
Supplement: Supplementary file [file 2020.04.19.20065219-1.pdf]

# COVID-19 Social Distancing Web Survey

## CONSENT DOCUMENT

---

Start of Block: CONSENT

### ***COVID-19 SOCIAL DISTANCING WEB SURVEY***

***David Bloom, David Canning, Mahesh Karra***

***Version: April 3, 2020***

You are being asked to take part in a research survey.

This survey is being conducted to learn about the prevalence of COVID-19 symptoms and social distancing behavior in the United States. We are interested in learning about how education, income, work and flu-like symptoms are linked to social distancing.

You are being asked to participate in this research because you are over 18 years old and are currently living in the United States. Your participation is voluntary and you may withdraw your participation at any time for any reason. You may skip any question you feel uncomfortable answering.

If you agree to participate in this study, you will be asked to take a short online survey. We will ask you a few questions about COVID-19 symptoms and about your age, gender, income, health, work, and your social distancing behaviors. The survey should take less than 5 minutes to complete.

The possible risks of participating in this study include anxiety and stress caused by some of the questions. There is a minimal risk of loss of confidentiality since we do not ask questions that can be used to identify you.

There are no direct benefits to you if you take part in this survey, but the information you provide will be used to protect and promote the health and the social and economic well-being of U.S. residents.

If you have any questions about this survey, you can contact Dr. David Canning at [covid19survey@hsph.harvard.edu](mailto:covid19survey@hsph.harvard.edu) or Dr. Mahesh Karra at [covid19survey@bu.edu](mailto:covid19survey@bu.edu)

This research has been reviewed by the Harvard Longwood Medical Area Institutional Review Board (Harvard IRB) and by the Boston University Institutional Review Board (BU IRB). If you wish to speak with someone from the Harvard IRB, please contact the Office of Human Research Administration (OHRA) by phone at 617-432-2157 (toll-free: 1-866-606-0573) or at 90

Smith Street, Boston, MA - 02120. If you wish to speak with someone from the BU IRB, please contact the Charles River IRB Office by phone at 617-358-6115, by e-mail at [irb@bu.edu](mailto:irb@bu.edu), or at 25 Buick St, Room 157, Boston, MA - 02215.

Thank you for your valuable time and participation. A summary of results from this survey will be published on <https://www.hsph.harvard.edu/pgda>

---

Q1

Are you at least 18 years of age and do you currently live in the United States?

Yes (1)

No (2)

Q2

Do you consent to participate in this survey?

Yes (1)

No (2)

End of Block: CONSENT

---

Start of Block: End Survey

## END OF SURVEY

Thank you again for your time and participation.

**If you or a household member has any of the symptoms that we asked about:**

The Centers for Disease Control and Prevention (CDC) has resources and advice on what to do if you or a household member is sick and if you think it may be COVID-19. Follow the link below for more details:

**<https://www.cdc.gov/coronavirus/2019-ncov/if-you-are-sick/steps-when-sick.html>**

If you are experiencing anxiety or stress due to COVID-19:

The **Disaster Distress Helpline, 1-800-985-5990**, is a 24/7, 365-day-a-year, national hotline dedicated to providing immediate crisis counseling for people who are experiencing emotional distress related to any natural or human-caused disaster, including disease outbreaks like COVID-19. This toll-free, multilingual, and confidential crisis support service is available to all residents in the United States and its territories.
